# Supplementary material
Source: PubMed Central journal article supplement (PMC4551261)
Supplement: AEM.00557-15_zam999116538so1.pdf [file AEM.00557-15_zam999116538so1.pdf]

## Supplementary Tables

Table S1: Environmental variables in the studied samples.

| Sample name | Soil temperature (°C)* | Air temperature (°C) | Soil pH | Moisture (%) | NO <sub>3</sub> <sup>-</sup> -N (mg kg <sup>-1</sup> ) | NH <sub>4</sub> <sup>+</sup> -N (mg kg <sup>-1</sup> ) | TOC (%) | TN (g kg <sup>-1</sup> ) | Released CH <sub>4</sub> (µg m <sup>-2</sup> h <sup>-1</sup> ) | Released CO <sub>2</sub> (mg m <sup>-2</sup> h <sup>-1</sup> ) | Released N <sub>2</sub> O (µg m <sup>-2</sup> h <sup>-1</sup> ) | Plant biomass (g m <sup>-2</sup> ) | Plant coverage (%) | Number of plant species |
|-------------|------------------------|----------------------|---------|--------------|--------------------------------------------------------|--------------------------------------------------------|---------|--------------------------|----------------------------------------------------------------|----------------------------------------------------------------|-----------------------------------------------------------------|------------------------------------|--------------------|-------------------------|
| 3200        | 12.91                  | 8.87                 | 7.88    | 22.4         | 0.928                                                  | 3.698                                                  | 6.84    | 5.35                     | -23.85                                                         | 799                                                            | 13.02                                                           | 535.4                              | 97                 | 23                      |
| 3200-3400   | 11.84                  | 8.61                 | 7.97    | 20.29        | 0.975                                                  | 3.42                                                   | 6.73    | 5.12                     | -30.82                                                         | 797                                                            | -4                                                              | 450.3                              | 99                 | 24                      |
| 3200-3600   | 9.77                   | 7.87                 | 7.72    | 28.27        | 1.312                                                  | 4.275                                                  | 6.26    | 5.11                     |                                                                |                                                                |                                                                 | 222.1                              | 77                 | 20                      |
| 3200-3800   | 8.86                   | 6.78                 | 7.68    | 31.2         | 0.981                                                  | 4.78                                                   | 6.04    | 4.79                     | -14.32                                                         | 545.9                                                          | 2.07                                                            | 323                                | 97                 | 25                      |
| 3400-3200   | 12.91                  | 8.87                 | 7.74    | 23.44        | 0.938                                                  | 1.287                                                  | 6.59    | 5.62                     | -13.97                                                         | 753.3                                                          | 10.88                                                           | 385.9                              | 97                 | 21                      |
| 3400        | 11.84                  | 8.61                 | 7.77    | 21.94        | 0.838                                                  | 2.078                                                  | 6.3     | 5.54                     | -38.8                                                          | 843.5                                                          | 0.16                                                            | 326.2                              | 98                 | 25                      |
| 3400-3600   | 9.77                   | 7.87                 | 7.62    | 16.29        | 1.148                                                  | 2.404                                                  | 6.22    | 5.61                     |                                                                |                                                                |                                                                 | 131.7                              | 68                 | 18                      |
| 3400-3800   | 8.86                   | 6.78                 | 7.21    | 28.54        | 0.811                                                  | 0.983                                                  | 6.12    | 5.45                     | -32.65                                                         | 502.1                                                          | -0.9                                                            | 185.8                              | 93                 | 26                      |
| 3600        | 9.77                   | 7.87                 | 7.59    | 25.63        | 1.585                                                  | 1.984                                                  | 5.99    | 5.12                     |                                                                |                                                                |                                                                 | 139.9                              | 72                 | 17                      |
| 3800-3200   | 12.91                  | 8.87                 | 7.17    | 24.1         | 1.202                                                  | 1.383                                                  | 5.66    | 4.98                     | -19.59                                                         | 711.9                                                          | 12.71                                                           | 274.2                              | 98                 | 18                      |
| 3800-3400   | 11.84                  | 8.61                 | 7.48    | 26.06        | 0.818                                                  | 1.251                                                  | 5.53    | 4.76                     | -34.12                                                         | 748.5                                                          | 2.27                                                            | 248.6                              | 98                 | 19                      |
| 3800-3600   | 9.77                   | 7.87                 | 7.68    | 33.58        | 1.752                                                  | 1.329                                                  | 5.48    | 4.85                     |                                                                |                                                                |                                                                 | 176.9                              | 80                 | 15                      |
| 3800        | 8.86                   | 6.78                 | 7.2     | 31.73        | 1.381                                                  | 1.497                                                  | 5.59    | 4.71                     | -12.98                                                         | 408.6                                                          | 1.38                                                            | 199.5                              | 77                 | 14                      |

\*Soil samples were collected at the depth of 0-10 cm, and soil temperature was measured at 5 cm depth.

Table S2: PerMANOVA test of the differences in bacterial community structure based on Bray-Curtis distance measures (permutation: 9999).

|       |               |               |               |
|-------|---------------|---------------|---------------|
| T3400 | <b>0.0117</b> |               |               |
| T3600 | <b>0.0001</b> | <b>0.0001</b> |               |
| T3800 | <b>0.0001</b> | <b>0.0006</b> | <b>0.0004</b> |
|       | T3200         | T3400         | T3600         |

Values in bold means significant difference between two groups at  $p < 0.05$ .

T3400 includes the samples transplanted to 3400 m and "home controls" at 3400 m.

Table S3: Bacterial diversity indices at 97% sequence similarity (per 2291 sequences).

| Elevation (m) | Number of OTUs | Chao1 estimator of richness | Shannon's diversity index | Shannon's evenness |
|---------------|----------------|-----------------------------|---------------------------|--------------------|
| 3200          | 1328±13        | 3233±165                    | 6.893±0.005               | 0.959±0.001        |
| 3200-3400     | 1331±32        | 3412±186                    | 6.888±0.032               | 0.958±0.002        |
| 3200-3600     | 1299±38        | 3264±50                     | 6.854±0.054               | 0.956±0.004        |
| 3200-3800     | 1316±238       | 3308±280                    | 6.882±0.027               | 0.958±0.002        |
| 3400-3200     | 1287±618       | 3278±299                    | 6.831±0.066               | 0.954±0.003        |
| 3400          | 1373±2         | 3616±136                    | 6.944±0.013               | 0.961±0.002        |
| 3400-3600     | 1317±22        | 3483±209                    | 6.860±0.022               | 0.955±0.002*       |
| 3400-3800     | 1345±10        | 3442±176                    | 6.919±0.010               | 0.960±0.001        |
| 3600          | 1292±8         | 3365±199                    | 6.833±0.012               | 0.954±0.001        |
| 3800-3200     | 1279±28*       | 3225±178                    | 6.787±0.033*              | 0.949±0.002*       |
| 3800-3400     | 1319±21        | 3203±58*                    | 6.856±0.030*              | 0.954±0.002*       |
| 3800-3600     | 1296±26*       | 3356±216                    | 6.856±0.034*              | 0.957±0.002*       |
| 3800          | 1461±75        | 4480±719                    | 7.034±0.074               | 0.966±0.003        |

\* Compared to their controls at “home” sites. The values of the transplanted samples were significantly decreased ( $p < 0.05$ ).

Table S4: Relative abundance (% of total reads) of abundant bacterial groups at the phylum (a), class (b), order (c) and genus (d) levels.

|                     | 3200          | 3200-3400       | 3200-3600      | 3200-3800      | 3400-3200     | 3400           | 3400-3600     | 3400-3800     | 3600          | 3800-3200     | 3800-3400      | 3800-3600    | 3800           |
|---------------------|---------------|-----------------|----------------|----------------|---------------|----------------|---------------|---------------|---------------|---------------|----------------|--------------|----------------|
| a) phylum           |               |                 |                |                |               |                |               |               |               |               |                |              |                |
| Proteobacteria      | 31.08±0.37ab  | 29.48±0.98bc    | 33.74±0.40ab   | 29.61±1.01bc   | 33.26±1.35ab  | 30.22±1.05bc   | 35.20±0.26a   | 32.79±1.69ab  | 31.63±1.03ab  | 32.90±1.16ab  | 26.22±1.43c    | 32.85±0.78ab | 30.60±1.48abc  |
| Actinobacteria      | 30.69±0.60a   | 30.93±1.13a     | 21.87±0.25d    | 27.16±1.11abc  | 27.79±1.13abc | 30.99±1.51a    | 21.90±1.94d   | 28.28±1.57abc | 23.44±0.64cd  | 31.05±0.41a   | 28.85±1.66ab   | 20.66±1.14d  | 24.33±1.15bcd  |
| Acidobacteria       | 10.13±0.49cde | 11.70±1.08abcde | 13.07±0.26abcd | 12.95±0.44abcd | 9.98±0.94de   | 10.58±0.97bcde | 13.46±1.33abc | 10.45±0.60cde | 13.91±0.05ab  | 9.05±0.76e    | 12.47±0.95abcd | 14.97±0.77a  | 12.63±0.75abcd |
| Bacteroidetes       | 5.02±0.38bcd  | 4.87±0.25bcd    | 4.02±0.28d     | 5.35±0.38abc   | 4.98±0.49bcd  | 5.49±0.20abc   | 3.80±0.36d    | 4.98±0.37bcd  | 4.74±0.15cd   | 5.89±0.18abc  | 6.59±0.39a     | 5.49±0.20abc | 6.20±0.34ab    |
| Planctomycetes      | 3.54±0.11a    | 3.08±0.40abc    | 2.90±0.14abc   | 2.36±0.19c     | 2.55±0.12bc   | 2.72±0.17bc    | 2.40±0.21c    | 3.01±0.16abc  | 2.66±0.21bc   | 3.23±0.17ab   | 2.52±0.08bc    | 2.44±0.09bc  | 2.62±0.22bc    |
| Verrucomicrobia     | 1.29±0.02cd   | 1.06±0.09d      | 3.03±0.20a     | 2.84±0.38a     | 1.28±0.33cd   | 1.29±0.21cd    | 3.27±0.09a    | 2.26±0.26abc  | 2.58±0.11ab   | 1.08±0.14d    | 1.60±0.19bcd   | 2.68±0.51a   | 2.85±0.32a     |
| Thaumarchaeota      | 1.70±0.25abc  | 1.92±0.13abc    | 1.20±0.05c     | 1.95±0.25abc   | 2.59±0.65ab   | 1.44±0.19bc    | 1.75±0.21abc  | 1.56±0.17bc   | 1.02±0.32c    | 1.98±0.16abc  | 2.79±0.26a     | 1.13±0.08c   | 2.25±0.45abc   |
| Chloroflexi         | 1.64±0.11ab   | 1.59±0.12ab     | 1.66±0.22ab    | 1.44±0.25ab    | 2.12±0.08a    | 1.72±0.24ab    | 1.72±0.35ab   | 1.75±0.21ab   | 1.56±0.08ab   | 1.64±0.17ab   | 1.98±0.09a     | 1.14±0.14b   | 1.44±0.19ab    |
| Gemmatimonadetes    | 1.12±0.15cd   | 1.35±0.29bcd    | 1.11±0.08cd    | 1.25±0.15bcd   | 2.17±0.24a    | 1.59±0.12bc    | 0.92±0.04d    | 1.25±0.07bcd  | 0.86±0.15d    | 1.08±0.20cd   | 1.76±0.10ab    | 1.00±0.04cd  | 1.40±0.05bcd   |
| Firmicutes          | 1.19±0.15abc  | 0.95±0.30bc     | 0.63±0.14c     | 0.77±0.08bc    | 2.14±0.65a    | 0.81±0.08bc    | 0.68±0.08c    | 1.02±0.31abc  | 1.93±0.20ab   | 1.53±0.14abc  | 1.12±0.01abc   | 1.40±0.41abc | 1.08±0.35abc   |
| Nitrospirae         | 0.12±0.04e    | 0.54±0.10de     | 2.14±0.28a     | 1.54±0.18abc   | 0.48±0.11de   | 0.58±0.27de    | 2.17±0.21a    | 0.97±0.10cd   | 1.89±0.16ab   | 0.13±0.04e    | 1.09±0.32cd    | 1.57±0.09abc | 1.38±0.21bc    |
| b) class            |               |                 |                |                |               |                |               |               |               |               |                |              |                |
| Actinobacteria      | 27.21±0.83ab  | 27.75±0.87ab    | 19.08±0.37d    | 23.62±0.99bc   | 24.73±0.86abc | 28.76±1.17a    | 18.48±1.72d   | 25.32±1.55abc | 21.27±0.65cd  | 27.58±0.47ab  | 26.09±1.69ab   | 18.36±1.32d  | 21.37±0.81cd   |
| Alphaproteobacteria | 17.59±0.86abc | 16.89±0.89abc   | 17.02±0.37abc  | 14.38±0.57cd   | 18.51±1.91ab  | 16.15±0.74abc  | 16.75±0.04abc | 16.85±0.78abc | 14.87±0.82bcd | 18.77±0.72a   | 12.38±1.07d    | 13.79±0.52cd | 14.55±1.01cd   |
| Betaproteobacteria  | 5.46±0.16e    | 6.29±0.56de     | 7.38±0.09bcd   | 7.74±0.30abc   | 6.34±0.54de   | 6.65±0.19cde   | 8.98±0.16a    | 7.89±0.34abc  | 7.57±0.31bcd  | 5.53±0.23e    | 6.61±0.07cde   | 8.96±0.38a   | 8.51±0.45ab    |
| Acidobacteria_Gp4   | 2.40±0.43d    | 2.46±0.29d      | 4.98±0.06ab    | 4.96±0.48ab    | 3.33±0.27bcd  | 3.08±0.55cd    | 5.75±0.64a    | 3.71±0.16bcd  | 4.26±0.55abc  | 2.28±0.18d    | 3.22±0.22cd    | 4.95±0.36ab  | 4.31±0.45abc   |
| Deltaproteobacteria | 2.50±0.48c    | 2.46±0.21c      | 4.93±0.19a     | 3.14±0.13c     | 2.91±0.66c    | 2.88±0.33c     | 5.05±0.39a    | 3.43±0.16bc   | 4.69±0.52ab   | 2.88±0.20c    | 3.22±0.03c     | 5.82±0.41a   | 3.01±0.43c     |
| Sphingobacteriia    | 2.84±0.23de   | 3.29±0.09bcde   | 2.71±0.22e     | 3.68±0.24abcd  | 2.72±0.23e    | 3.46±0.14bcde  | 2.52±0.20e    | 3.38±0.17bcde | 3.17±0.23cde  | 3.39±0.21bcde | 4.41±0.29a     | 3.83±0.07abc | 4.16±0.43ab    |
| Gammaproteobacteria | 4.36±0.38a    | 2.85±0.24b      | 2.88±0.22b     | 3.10±0.13ab    | 4.32±0.72a    | 3.10±0.36ab    | 2.76±0.32b    | 3.38±0.28ab   | 3.16±0.14ab   | 4.38±0.11a    | 2.88±0.26b     | 2.78±0.42b   | 2.88±0.34b     |
| Acidobacteria_Gp6   | 3.84±0.30ab   | 4.38±0.37a      | 2.77±0.02cd    | 2.53±0.04d     | 2.31±0.31def  | 1.64±0.18efg   | 0.86±0.06g    | 1.47±0.20fg   | 2.42±0.23de   | 3.74±0.33ab   | 3.61±0.10abc   | 2.82±0.14cd  | 3.01±0.16bcd   |
| Planctomycetia      | 3.27±0.13a    | 2.95±0.42abc    | 2.77±0.17abc   | 2.18±0.25c     | 2.42±0.10bc   | 2.59±0.19abc   | 2.20±0.23c    | 2.91±0.11abc  | 2.55±0.20abc  | 3.16±0.17ab   | 2.37±0.05bc    | 2.33±0.13bc  | 2.53±0.20abc   |
| Spartobacteria      | 0.76±0.07c    | 0.55±0.05c      | 2.12±0.48a     | 2.11±0.30a     | 0.64±0.10c    | 0.68±0.16c     | 2.11±0.12a    | 1.37±0.20abc  | 1.73±0.13ab   | 0.63±0.15c    | 0.87±0.18bc    | 1.72±0.42ab  | 2.17±0.24a     |
| Acidobacteria_Gp7   | 0.71±0.04bc   | 1.16±0.19abc    | 1.03±0.11abc   | 0.92±0.16abc   | 1.11±0.27abc  | 1.62±0.34a     | 1.50±0.18a    | 1.28±0.08ab   | 1.35±0.25ab   | 0.47±0.10c    | 1.30±0.17ab    | 1.47±0.15ab  | 0.89±0.04abc   |

|                                          |              |                |               |               |               |                |               |                |               |               |               |               |               |
|------------------------------------------|--------------|----------------|---------------|---------------|---------------|----------------|---------------|----------------|---------------|---------------|---------------|---------------|---------------|
| Acidobacteria_Gp3                        | 0.67±0.02de  | 0.80±0.11bcde  | 1.53±0.15abcd | 1.31±0.07bcde | 0.71±0.29cde  | 0.92±0.02bcde  | 1.59±0.48abc  | 0.77±0.06cde   | 1.69±0.42ab   | 0.42±0.07e    | 0.99±0.17bcde | 2.20±0.13a    | 1.09±0.07bcde |
| Nitrospira                               | 0.09±0.04e   | 0.51±0.08de    | 2.14±0.28a    | 1.50±0.17abc  | 0.45±0.10de   | 0.58±0.27de    | 2.14±0.21a    | 0.96±0.11cd    | 1.88±0.14ab   | 0.12±0.04e    | 1.02±0.34cd   | 1.57±0.09abc  | 1.35±0.20bc   |
| c) order                                 |              |                |               |               |               |                |               |                |               |               |               |               |               |
| Actinomycetales                          | 13.25±0.54ab | 13.97±1.11a    | 7.25±0.22d    | 9.89±0.85bcd  | 11.19±0.63abc | 13.14±1.44ab   | 7.11±1.17d    | 10.10±1.13bcd  | 8.80±0.07cd   | 14.58±0.51a   | 12.19±1.40abc | 7.23±0.65d    | 9.09±0.28cd   |
| Rhizobiales                              | 11.92±0.75ab | 11.16±0.64abcd | 11.68±0.51abc | 9.44±0.21cde  | 12.49±1.09ab  | 10.39±0.53bcde | 9.12±0.41de   | 10.19±0.22bcde | 8.51±0.41e    | 13.43±0.45a   | 8.54±0.52e    | 8.69±0.50e    | 8.86±0.73de   |
| Solirubrobacterales                      | 6.36±0.22a   | 5.38±0.16abc   | 4.37±0.25cde  | 4.74±0.26cde  | 4.73±0.29cde  | 6.05±0.26ab    | 3.75±0.38e    | 5.44±0.09abc   | 4.79±0.40cde  | 6.33±0.28a    | 5.21±0.43abcd | 4.04±0.20de   | 4.87±0.44bcde |
| Sphingobacteriales                       | 2.84±0.23de  | 3.29±0.09bcde  | 2.71±0.22e    | 3.68±0.24abcd | 2.72±0.23e    | 3.46±0.14bcde  | 2.52±0.20e    | 3.38±0.17bcde  | 3.17±0.23cde  | 3.39±0.21bcde | 4.41±0.29a    | 3.83±0.07abc  | 4.16±0.43ab   |
| Gaiellales                               | 2.36±0.16c   | 3.65±0.53abc   | 3.01±0.12abc  | 3.91±0.11ab   | 3.86±0.53ab   | 4.09±0.40ab    | 3.10±0.32abc  | 4.29±0.38a     | 3.17±0.42abc  | 2.31±0.16c    | 3.70±0.23abc  | 2.74±0.25bc   | 3.17±0.44abc  |
| Planctomycetales                         | 3.16±0.11a   | 2.76±0.42abc   | 2.62±0.22abc  | 2.07±0.26c    | 2.30±0.08bc   | 2.50±0.21abc   | 2.01±0.16c    | 2.82±0.14abc   | 2.42±0.15abc  | 3.06±0.23ab   | 2.24±0.03bc   | 2.26±0.12bc   | 2.40±0.20abc  |
| Acidimicrobiales                         | 2.53±0.21abc | 1.85±0.22bcd   | 1.88±0.34bcd  | 2.60±0.08a    | 1.96±0.14abcd | 2.21±0.09abcd  | 2.01±0.06abcd | 2.55±0.14ab    | 1.91±0.10bcd  | 1.83±0.26cd   | 2.23±0.11abcd | 1.92±0.19abcd | 1.80±0.13d    |
| Myxococcales                             | 1.63±0.32c   | 1.37±0.21c     | 3.30±0.20a    | 1.73±0.07bc   | 1.85±0.51bc   | 1.57±0.07c     | 2.58±0.16ab   | 1.89±0.10bc    | 2.25±0.15bc   | 1.95±0.16bc   | 1.91±0.16bc   | 3.20±0.07a    | 1.46±0.20c    |
| Burkholderiales                          | 2.01±0.13ab  | 1.86±0.25ab    | 1.62±0.22b    | 2.31±0.25ab   | 1.63±0.09b    | 1.47±0.12b     | 1.76±0.24b    | 2.07±0.25ab    | 1.79±0.32b    | 1.98±0.20ab   | 1.69±0.14b    | 2.34±0.23ab   | 2.69±0.16a    |
| Nitrososphaerales                        | 1.70±0.25abc | 1.92±0.13abc   | 1.20±0.05c    | 1.95±0.25abc  | 2.59±0.65ab   | 1.44±0.19bc    | 1.75±0.21abc  | 1.56±0.17bc    | 1.02±0.32c    | 1.98±0.16abc  | 2.79±0.26a    | 1.13±0.08c    | 2.25±0.45abc  |
| Rhodospirillales                         | 1.19±0.08bc  | 1.47±0.17abc   | 1.22±0.09abc  | 1.44±0.23abc  | 1.31±0.21abc  | 1.48±0.14abc   | 1.96±0.18a    | 1.62±0.27abc   | 1.75±0.22ab   | 1.25±0.13abc  | 0.93±0.17c    | 1.59±0.04abc  | 1.50±0.22abc  |
| Xanthomonadales                          | 1.70±0.14ab  | 1.30±0.17ab    | 0.70±0.03b    | 0.89±0.05b    | 2.17±0.70a    | 1.41±0.26ab    | 0.73±0.17b    | 1.18±0.20ab    | 0.89±0.13b    | 2.14±0.22a    | 1.00±0.18b    | 0.64±0.12b    | 0.79±0.13b    |
| Nitrospirales                            | 0.09±0.04e   | 0.51±0.08de    | 2.14±0.28a    | 1.50±0.17abc  | 0.45±0.10de   | 0.58±0.27de    | 2.14±0.21a    | 0.96±0.11cd    | 1.88±0.14ab   | 0.12±0.04e    | 1.02±0.34cd   | 1.57±0.09abc  | 1.35±0.20bc   |
| d) genus                                 |              |                |               |               |               |                |               |                |               |               |               |               |               |
| Gp4                                      | 2.37±0.40e   | 2.40±0.29e     | 4.98±0.06ab   | 4.82±0.45abc  | 3.32±0.26cde  | 3.06±0.55de    | 5.70±0.64a    | 3.70±0.16bcde  | 4.23±0.55abcd | 2.26±0.16e    | 3.13±0.22de   | 4.93±0.37abc  | 4.13±0.49abcd |
| Gaiella                                  | 2.36±0.16c   | 3.65±0.53abc   | 3.01±0.12abc  | 3.91±0.11ab   | 3.86±0.53ab   | 4.09±0.40ab    | 3.10±0.32abc  | 4.29±0.38a     | 3.17±0.42abc  | 2.31±0.16c    | 3.70±0.23abc  | 2.74±0.25bc   | 3.17±0.44abc  |
| Gp6                                      | 3.84±0.30ab  | 4.38±0.37a     | 2.77±0.02cd   | 2.53±0.04d    | 2.31±0.31def  | 1.64±0.18efg   | 0.86±0.06g    | 1.47±0.20fg    | 2.42±0.23de   | 3.74±0.33ab   | 3.61±0.10abc  | 2.82±0.14cd   | 3.01±0.16bcd  |
| Solirubrobacter                          | 3.03±0.05abc | 2.94±0.04abcd  | 1.83±0.15e    | 2.50±0.04cd   | 2.88±0.20abcd | 3.07±0.01abc   | 1.72±0.25e    | 3.27±0.09ab    | 2.28±0.17de   | 3.39±0.21a    | 3.10±0.26abc  | 1.85±0.12e    | 2.63±0.24bcd  |
| Nitrososphaera                           | 1.70±0.25abc | 1.92±0.13abc   | 1.20±0.05c    | 1.95±0.25abc  | 2.59±0.65ab   | 1.44±0.19bc    | 1.75±0.21abc  | 1.56±0.17bc    | 1.02±0.32c    | 1.98±0.16abc  | 2.79±0.26a    | 1.13±0.08c    | 2.25±0.45abc  |
| Pseudonocardia                           | 2.72±0.33ab  | 1.61±0.36cd    | 1.81±0.08bcd  | 1.21±0.14cd   | 2.23±0.53abc  | 1.31±0.23cd    | 1.69±0.11cd   | 1.37±0.13cd    | 1.21±0.25cd   | 2.91±0.18a    | 1.29±0.21cd   | 2.05±0.18abc  | 0.96±0.02d    |
| Bradyrhizobium                           | 1.66±0.31a   | 1.43±0.23a     | 1.72±0.23a    | 1.24±0.21a    | 1.31±0.24a    | 1.53±0.05a     | 1.28±0.17a    | 1.27±0.13a     | 1.00±0.09a    | 1.50±0.12a    | 1.66±0.21a    | 1.06±0.05a    | 1.22±0.16a    |
| Spartobacteria_genera_<br>incertae_sedis | 0.76±0.07b   | 0.54±0.04b     | 2.12±0.48a    | 2.11±0.30a    | 0.64±0.10b    | 0.68±0.16b     | 2.11±0.12a    | 1.37±0.20ab    | 1.73±0.13a    | 0.61±0.14b    | 0.87±0.18b    | 1.70±0.41a    | 2.17±0.24a    |

|                     |               |              |              |               |               |              |              |              |              |               |             |              |              |
|---------------------|---------------|--------------|--------------|---------------|---------------|--------------|--------------|--------------|--------------|---------------|-------------|--------------|--------------|
| Gp7                 | 0.71±0.04bc   | 1.16±0.19abc | 1.03±0.11abc | 0.92±0.16abc  | 1.11±0.27abc  | 1.62±0.34a   | 1.50±0.18a   | 1.28±0.08ab  | 1.35±0.25ab  | 0.47±0.10c    | 1.30±0.17ab | 1.47±0.15ab  | 0.89±0.04abc |
| <i>Nocardioides</i> | 1.08±0.12abcd | 1.35±0.19abc | 0.50±0.05cd  | 1.12±0.09abcd | 1.18±0.09abcd | 1.95±0.43a   | 0.55±0.18bcd | 0.93±0.30bcd | 0.87±0.16bcd | 1.22±0.23abcd | 1.46±0.35ab | 0.42±0.08d   | 0.90±0.11bcd |
| <i>Nitrospira</i>   | 0.07±0.02f    | 0.38±0.07ef  | 1.92±0.25ab  | 1.35±0.14bcd  | 0.38±0.11ef   | 0.54±0.25ef  | 2.04±0.21a   | 0.90±0.09cde | 1.78±0.12ab  | 0.10±0.03f    | 0.76±0.26de | 1.44±0.10abc | 1.28±0.21bcd |
| <i>Gemmatimonas</i> | 0.83±0.15bc   | 0.93±0.15bc  | 0.89±0.05bc  | 0.97±0.15bc   | 1.53±0.23a    | 1.05±0.09abc | 0.70±0.06c   | 1.05±0.09abc | 0.65±0.14c   | 0.74±0.12bc   | 1.25±0.01ab | 0.89±0.05bc  | 0.96±0.10bc  |
| <i>Blastococcus</i> | 1.29±0.48ab   | 1.86±0.16a   | 0.24±0.02c   | 0.99±0.19bc   | 1.09±0.13ab   | 1.41±0.06ab  | 0.31±0.14c   | 0.64±0.14bc  | 0.25±0.08c   | 1.11±0.17ab   | 1.28±0.25ab | 0.19±0.03c   | 0.99±0.15bc  |

Duncan's multiple comparison was used. Values labeled with red color were higher than those not labeled.

Table S5: The number of OTUs significantly associated to each site ( $p < 0.05$ ) through indicator analysis.

|                             | associated to 1 site |       |       |       | associated to 2 sites |       |       |       |       |       | associated to 3 sites |       |       |       | Total number |
|-----------------------------|----------------------|-------|-------|-------|-----------------------|-------|-------|-------|-------|-------|-----------------------|-------|-------|-------|--------------|
|                             | G1000*               | G0100 | G0010 | G0001 | G1100                 | G0110 | G0011 | G1010 | G0101 | G1001 | G1110                 | G1101 | G0111 | G1011 |              |
| Acidobacteria               | 14                   | 7     | 31    | 7     | 18                    | 3     | 22    | 1     | 7     | 2     | 0                     | 11    | 8     | 2     | 133          |
| Actinobacteria              | 46                   | 31    | 26    | 8     | 42                    | 4     | 38    | 1     | 11    | 8     | 2                     | 36    | 20    | 2     | 275          |
| Alphaproteobacteria         | 42                   | 5     | 34    | 8     | 22                    | 1     | 16    | 0     | 3     | 4     | 1                     | 11    | 10    | 4     | 161          |
| Betaproteobacteria          | 11                   | 5     | 21    | 1     | 6                     | 0     | 7     | 0     | 3     | 2     | 1                     | 3     | 9     | 0     | 69           |
| Deltaproteobacteria         | 5                    | 2     | 23    | 4     | 4                     | 0     | 6     | 0     | 0     | 0     | 0                     | 0     | 2     | 1     | 47           |
| Gammaproteobacteria         | 10                   | 1     | 4     | 2     | 5                     | 0     | 1     | 0     | 0     | 1     | 0                     | 0     | 1     | 0     | 25           |
| unclassified Proteobacteria | 3                    | 4     | 2     | 0     | 0                     | 0     | 0     | 0     | 0     | 1     | 0                     | 1     | 1     | 1     | 13           |
| Armatimonadetes             | 0                    | 1     | 1     | 0     | 1                     | 0     | 0     | 0     | 0     | 0     | 0                     | 0     | 0     | 0     | 3            |
| Bacteroidetes               | 7                    | 8     | 7     | 5     | 4                     | 0     | 5     | 1     | 3     | 1     | 0                     | 4     | 2     | 0     | 47           |
| Chlamydiae                  | 1                    | 0     | 0     | 0     | 0                     | 0     | 0     | 0     | 0     | 0     | 0                     | 0     | 0     | 0     | 1            |
| Chloroflexi                 | 1                    | 1     | 4     | 0     | 3                     | 0     | 3     | 0     | 1     | 0     | 0                     | 1     | 0     | 1     | 15           |
| Firmicutes                  | 3                    | 1     | 3     | 1     | 0                     | 0     | 1     | 0     | 0     | 0     | 0                     | 0     | 0     | 1     | 10           |
| Gemmatimonadetes            | 4                    | 0     | 2     | 3     | 4                     | 0     | 0     | 0     | 1     | 0     | 0                     | 0     | 0     | 0     | 14           |
| Latescibacteria             | 1                    | 0     | 1     | 1     | 0                     | 0     | 0     | 0     | 0     | 0     | 0                     | 0     | 0     | 0     | 3            |
| Nitrospirae                 | 0                    | 1     | 2     | 0     | 2                     | 0     | 4     | 0     | 0     | 0     | 0                     | 0     | 3     | 0     | 12           |
| Planctomycetes              | 9                    | 4     | 4     | 1     | 1                     | 0     | 0     | 0     | 1     | 1     | 0                     | 0     | 0     | 0     | 21           |
| Thaumarchaeota              | 4                    | 1     | 0     | 1     | 6                     | 0     | 2     | 0     | 1     | 1     | 0                     | 3     | 3     | 0     | 22           |
| Verrucomicrobia             | 0                    | 2     | 6     | 1     | 0                     | 1     | 11    | 0     | 0     | 1     | 0                     | 1     | 0     | 1     | 24           |
| candidate division WPS-2    | 1                    | 0     | 0     | 0     | 1                     | 0     | 0     | 0     | 0     | 0     | 0                     | 0     | 0     | 0     | 2            |
| unclassified bacteria       | 21                   | 14    | 24    | 2     | 13                    | 2     | 11    | 1     | 4     | 1     | 1                     | 7     | 4     | 1     | 106          |
| Total number                | 183                  | 88    | 195   | 45    | 132                   | 11    | 127   | 4     | 35    | 23    | 5                     | 78    | 63    | 14    | 1003         |

\* G=group. G is followed by site number, representing the objective elevations (3200, 3400, 3600 and 3800m sequentially), in which 1 indicates association and 0 indicates no association to a site. For example, G1101 represents the group of OTUs associated to 3200, 3400 and 3800m, but not associated to 3600m.

Table S6: OTUs with the highest p-value ( $p < 0.001$ ) associated to each site through indicator analysis.

| Group*    | OTU_ID | Phylum/Class        | Family/Genus            |
|-----------|--------|---------------------|-------------------------|
| (a) G1000 |        |                     |                         |
|           | 131    | Alphaproteobacteria | <i>Geminicoccus</i>     |
|           | 503    | Actinobacteria      | <i>Streptomyces</i>     |
|           | 1110   | Alphaproteobacteria | <i>Microvirga</i>       |
|           | 731    | Actinobacteria      | <i>Pseudonocardia</i>   |
|           | 120    | Alphaproteobacteria | <i>Mesorhizobium</i>    |
|           | 1501   | Alphaproteobacteria | Hyphomicrobiaceae       |
|           | 1258   | Thaumarchaeota      | <i>Nitrososphaera</i>   |
|           | 3229   | Alphaproteobacteria | <i>Microvirga</i>       |
|           | 2705   | Acidobacteria       | Gp4                     |
|           | 1120   | Alphaproteobacteria | <i>Pedomicrobium</i>    |
| (b) G0100 |        |                     |                         |
|           | 1449   | Actinobacteria      | Intrasporangiaceae      |
|           | 3884   | Bacteroidetes       | Chitinophagaceae        |
| (c) G0010 |        |                     |                         |
|           | 5420   | Acidobacteria       | Gp7                     |
|           | 1003   | Acidobacteria       | Gp4                     |
|           | 5675   | Acidobacteria       | Gp2                     |
|           | 5331   | Alphaproteobacteria | <i>Rhodomicrobium</i>   |
|           | 5352   | Acidobacteria       | Gp1                     |
|           | 3967   | Alphaproteobacteria | Rhodospirillaceae       |
|           | 6042   | Alphaproteobacteria | Hyphomicrobiaceae       |
|           | 5851   | Deltaproteobacteria | <i>Anaeromyxobacter</i> |



|           |      |                     |                                      |
|-----------|------|---------------------|--------------------------------------|
|           | 5255 | Deltaproteobacteria | <i>Cystobacter</i>                   |
|           | 5587 | Acidobacteria       | Gp4                                  |
| (d) G1100 |      |                     |                                      |
|           | 414  | Actinobacteria      | <i>Pseudonocardia</i>                |
|           | 38   | Thaumarchaeota      | <i>Nitrososphaera</i>                |
|           | 212  | Actinobacteria      | <i>Solirubrobacter</i>               |
|           | 460  | Actinobacteria      | <i>Rubrobacter</i>                   |
|           | 761  | Actinobacteria      | <i>Agromyces</i>                     |
|           | 553  | Acidobacteria       | Gp6                                  |
|           | 289  | Gammaproteobacteria | <i>Steroidobacter</i>                |
|           | 1853 | Acidobacteria       | Gp6                                  |
|           | 602  | Thaumarchaeota      | <i>Nitrososphaera</i>                |
|           | 181  | Actinobacteria      | <i>Microclunatus</i>                 |
| (e) G0011 |      |                     |                                      |
|           | 1759 | Nitrospirae         | <i>Nitrospira</i>                    |
|           | 814  | Actinobacteria      | <i>Pseudonocardia</i>                |
|           | 3935 | Actinobacteria      | <i>Gaiella</i>                       |
|           | 3901 | Verrucomicrobia     | Spartobacteria_genera_incertae_sedis |
|           | 4973 | Thaumarchaeota      | <i>Nitrososphaera</i>                |
|           | 2183 | Alphaproteobacteria | Rhodospirillaceae                    |
|           | 4635 | Nitrospirae         | <i>Nitrospira</i>                    |
|           | 4149 | Nitrospirae         | <i>Nitrospira</i>                    |
|           | 601  | Betaproteobacteria  | Oxalobacteraceae                     |
|           | 5207 | Acidobacteria       | Gp1                                  |
| (f) G0101 |      |                     |                                      |
|           | 3797 | Actinobacteria      | <i>Gaiella</i>                       |

|           |           |                     |                        |                |
|-----------|-----------|---------------------|------------------------|----------------|
| (g) G1001 | 3196      | Actinobacteria      | <i>Modestobacter</i>   |                |
|           | 1063      | Actinobacteria      | <i>Solirubrobacter</i> |                |
|           | 17        | Bacteroidetes       | <i>Ohtaekwangia</i>    |                |
| (h) G1101 | 1112      | Actinobacteria      | <i>Solirubrobacter</i> |                |
|           | 117       | Acidobacteria       | Gp4                    |                |
|           | 3         | Actinobacteria      | <i>Blastococcus</i>    |                |
|           | 104       | Actinobacteria      | <i>Blastococcus</i>    |                |
|           | 1210      | Actinobacteria      | <i>Gaiella</i>         |                |
|           | 239       | Actinobacteria      | Intrasporangiaceae     |                |
|           | 1359      | Thaumarchaeota      | <i>Nitrososphaera</i>  |                |
|           | 567       | Acidobacteria       | Gp7                    |                |
|           | 144       | Alphaproteobacteria | <i>Microvirga</i>      |                |
|           | 726       | Actinobacteria      | <i>Solirubrobacter</i> |                |
|           | 1082      | Actinobacteria      | <i>Blastococcus</i>    |                |
|           | (i) G0111 | 3538                | Thaumarchaeota         | Nitrososphaera |
|           |           | 1586                | Betaproteobacteria     | Rhodocyclaceae |
| 2856      |           | Actinobacteria      | <i>Gaiella</i>         |                |
| 5093      |           | Nitrospirae         | <i>Nitrospira</i>      |                |
| 1813      |           | Bacteroidetes       | <i>Terrimonas</i>      |                |
| 3721      |           | Actinobacteria      | <i>Ilumatobacter</i>   |                |
| (j) G1011 | 1309      | Chloroflexi         | Anaerolineaceae        |                |

---

\*Top 10 OTUs are shown here if more than 10 OTUs were with  $p < 0.001$  in a group. G=group.

Table S7: Spearman's correlation coefficients between environmental variables.

|                                 |                   |                     |                  |                                 |                                 |         |         |          |         |               |                |                         |                          |                          |
|---------------------------------|-------------------|---------------------|------------------|---------------------------------|---------------------------------|---------|---------|----------|---------|---------------|----------------|-------------------------|--------------------------|--------------------------|
| Objective elevation             | .034              |                     |                  |                                 |                                 |         |         |          |         |               |                |                         |                          |                          |
| Soil temperature                | -.034             | -1.000**            |                  |                                 |                                 |         |         |          |         |               |                |                         |                          |                          |
| NO <sub>3</sub> <sup>-</sup> -N | .346*             | .236                | -.236            |                                 |                                 |         |         |          |         |               |                |                         |                          |                          |
| NH <sub>4</sub> <sup>+</sup> -N | -.661**           | -.008               | .008             | -.162                           |                                 |         |         |          |         |               |                |                         |                          |                          |
| TOC                             | -.833**           | -.414**             | .414**           | -.398*                          | .474**                          |         |         |          |         |               |                |                         |                          |                          |
| TN                              | -.414**           | -.328*              | .328*            | -.322*                          | .045                            | .696**  |         |          |         |               |                |                         |                          |                          |
| Moisture                        | .245              | .442**              | -.442**          | .341*                           | -.140                           | -.493** | -.542** |          |         |               |                |                         |                          |                          |
| Soil pH                         | -.673**           | -.328*              | .328*            | -.040                           | .549**                          | .658**  | .274    | -.205    |         |               |                |                         |                          |                          |
| Plant biomass                   | -.465**           | -.577**             | .577**           | -.447**                         | .339*                           | .538**  | .091    | -.151    | .437**  |               |                |                         |                          |                          |
| Plant coverage                  | -.169             | -.571**             | .571**           | -.487**                         | .129                            | .271    | -.017   | -.194    | .168    | .797**        |                |                         |                          |                          |
| Number of plant species         | -.562**           | -.122               | .122             | -.599**                         | .215                            | .504**  | .321*   | -.068    | .270    | .430**        | .489**         |                         |                          |                          |
| Released CH <sub>4</sub>        | .006              | -.070               | .070             | .400*                           | .256                            | -.062   | -.183   | .332     | -.035   | .100          | -.164          | -.188                   |                          |                          |
| Released CO <sub>2</sub>        | -.227             | -.664**             | .664**           | -.253                           | .146                            | .520**  | .427*   | -.594**  | .547**  | .635**        | .606**         | .077                    | -.203                    |                          |
| Released N <sub>2</sub> O       | .105              | -.594**             | .594**           | .162                            | -.026                           | .140    | .124    | -.270    | -.088   | .236          | .109           | -.333                   | .227                     | .186                     |
|                                 | Initial elevation | Objective elevation | Soil temperature | NO <sub>3</sub> <sup>-</sup> -N | NH <sub>4</sub> <sup>+</sup> -N | TOC     | TN      | Moisture | Soil pH | Plant biomass | Plant coverage | Number of plant species | Released CH <sub>4</sub> | Released CO <sub>2</sub> |

\*\* Correlation is significant at p < 0.01 level. \* Significant at p < 0.05 level.

Table S8: Spearman's correlation between the relative abundance of important genera (relative abundance > 0.01%) and environmental variables.

|                                      | Soil temperature | Plant biomass | TOC     | TN      | NO <sub>3</sub> <sup>-</sup> -N | NH <sub>4</sub> <sup>+</sup> -N | Moisture | Soil pH | Released CH <sub>4</sub> <sup>a</sup> | Released CO <sub>2</sub> <sup>a</sup> | Released N <sub>2</sub> O <sup>a</sup> |
|--------------------------------------|------------------|---------------|---------|---------|---------------------------------|---------------------------------|----------|---------|---------------------------------------|---------------------------------------|----------------------------------------|
| Gp4                                  | -.634**          | -.614**       | -.264   | -.068   | .314                            | .116                            | .061     | -.018   | .030                                  | -.501**                               | -.144                                  |
| Gp6                                  | .432**           | .459**        | -.059   | -.532** | .072                            | .059                            | .071     | .110    | .044                                  | .290                                  | .143                                   |
| Solirubrobacter                      | .380*            | .438**        | .127    | .090    | -.471**                         | -.351*                          | -.092    | -.233   | -.378                                 | .284                                  | .142                                   |
| Pseudonocardia                       | .550**           | .198          | .229    | .286    | .030                            | .111                            | -.062    | .200    | .333                                  | .416*                                 | .399*                                  |
| Spartobacteria_genera_incertae_sedis | -.749**          | -.620**       | -.372*  | -.239   | .287                            | .168                            | .287     | -.278   | .077                                  | -.776**                               | -.248                                  |
| Nocardioides                         | .368*            | .538**        | .235    | .020    | -.336*                          | -.106                           | -.272    | .048    | -.334                                 | .504**                                | .108                                   |
| Nitrospira                           | -.697**          | -.714**       | -.329*  | -.105   | .375*                           | .133                            | .137     | -.102   | .060                                  | -.549**                               | -.379                                  |
| Blastococcus                         | .409*            | .683**        | .300    | -.016   | -.458**                         | .076                            | -.296    | .144    | -.281                                 | .323                                  | .008                                   |
| Terrimonas                           | -.242            | .057          | -.432** | -.688** | -.037                           | -.019                           | .357*    | -.158   | -.005                                 | -.263                                 | -.145                                  |
| Gp17                                 | .084             | .040          | .364*   | .487**  | -.144                           | -.089                           | -.350*   | .077    | -.178                                 | .105                                  | .044                                   |
| Pedomicrobium                        | .665**           | .514**        | .499**  | .275    | -.066                           | .181                            | -.269    | .328*   | .140                                  | .508**                                | .571**                                 |
| Mesorhizobium                        | .553**           | .518**        | .424**  | .350*   | -.470**                         | -.054                           | -.331*   | .016    | -.080                                 | .281                                  | .304                                   |
| Ferruginibacter                      | -.278            | -.380*        | -.586** | -.401*  | .257                            | -.287                           | .392*    | -.334*  | -.343                                 | -.159                                 | -.097                                  |
| Ohtaekwangia                         | .564**           | .654**        | .277    | .060    | -.478**                         | .013                            | -.254    | -.016   | .055                                  | .534**                                | .338                                   |
| Subdivision3_genera_incertae_sedis   | -.415**          | -.469**       | -.060   | .237    | .107                            | -.048                           | .017     | -.076   | -.473*                                | -.209                                 | -.286                                  |
| Sphingomonas                         | .364*            | .417**        | .500**  | .331*   | -.454**                         | .077                            | -.276    | .132    | .071                                  | .166                                  | -.033                                  |
| WPS_2_genera_incertae_sedis          | .071             | .469**        | .171    | -.041   | -.274                           | .110                            | .131     | .105    | .012                                  | -.018                                 | .056                                   |
| Microvirga                           | .555**           | .660**        | .339*   | .095    | -.450**                         | -.012                           | -.166    | .049    | -.059                                 | .322                                  | .390*                                  |
| Steroidobacter                       | .579**           | .474**        | .363*   | .231    | -.417**                         | .151                            | -.329*   | .247    | -.037                                 | .534**                                | .453*                                  |
| Pirellula                            | .433**           | .251          | .194    | .120    | -.084                           | -.188                           | -.186    | .064    | -.312                                 | .395*                                 | .271                                   |
| Geminicoccus                         | .035             | .072          | .035    | .109    | -.414**                         | -.197                           | -.084    | -.195   | -.546**                               | -.020                                 | -.292                                  |

|                           |         |         |         |         |         |       |         |        |        |         |         |
|---------------------------|---------|---------|---------|---------|---------|-------|---------|--------|--------|---------|---------|
| Gp1                       | -.569** | -.618** | -.297   | -.092   | .297    | .227  | .190    | .007   | -.151  | -.310   | -.546** |
| Amaricoccus               | .545**  | .644**  | .478**  | .279    | -.391*  | -.024 | -.145   | .102   | -.035  | .453*   | .249    |
| Hyphomicrobium            | -.110   | -.268   | .030    | .183    | .418**  | -.051 | .039    | -.120  | .549** | -.067   | .256    |
| Devosia                   | .169    | .117    | .380*   | .450**  | -.225   | -.017 | -.371*  | -.098  | -.087  | .169    | .137    |
| Gemmata                   | -.412*  | -.454** | -.222   | -.111   | .283    | .059  | -.123   | -.191  | -.122  | -.257   | -.189   |
| Phyllobacterium           | .651**  | .492**  | .359*   | .288    | -.339*  | -.059 | -.217   | .118   | .182   | .542**  | .311    |
| Lysobacter                | .616**  | .359*   | .298    | .241    | -.265   | -.172 | -.304   | -.004  | -.064  | .357    | .451*   |
| Phenyllobacterium         | .244    | .079    | .177    | .361*   | -.482** | -.158 | -.295   | -.132  | -.337  | .007    | .024    |
| Streptomyces              | .505**  | .391*   | .351*   | .357*   | -.126   | .055  | -.282   | .063   | .217   | .307    | .304    |
| Gp2                       | -.518** | -.666** | -.302   | -.079   | .420**  | -.008 | .260    | -.040  | -.234  | -.390*  | -.323   |
| Geobacter                 | -.653** | -.635** | -.437** | -.140   | .227    | -.076 | .246    | -.202  | -.140  | -.553** | -.294   |
| Aciditerrimonas           | -.211   | .063    | -.230   | -.338*  | -.122   | -.157 | .288    | -.230  | .072   | -.522** | .090    |
| Microbacterium            | .517**  | .353*   | .220    | .027    | -.040   | -.167 | -.213   | .096   | -.177  | .426*   | .212    |
| Microlunatus              | .526**  | .571**  | .272    | -.023   | -.110   | .046  | -.154   | .417** | .068   | .411*   | .297    |
| Rubroacter                | .723**  | .603**  | .411*   | .323*   | -.444** | -.144 | -.398*  | .098   | -.057  | .675**  | .518**  |
| Modestobacter             | .076    | .304    | .158    | .039    | -.439** | -.084 | -.144   | .038   | -.408* | .197    | -.419*  |
| Skermanella               | .275    | .491**  | .223    | .078    | -.333*  | -.068 | -.029   | .041   | -.013  | .025    | -.006   |
| Chelatococcus             | .604**  | .608**  | .236    | .199    | -.319   | -.011 | -.112   | .191   | -.025  | .441*   | .267    |
| Agromyces                 | .695**  | .470**  | .344*   | .326*   | -.295   | -.211 | -.381*  | .047   | -.156  | .488**  | .484*   |
| Gp5                       | .202    | .246    | -.152   | -.434** | .289    | .166  | .270    | .254   | .169   | .150    | .153    |
| Cystobacter               | -.494** | -.408*  | -.166   | -.167   | .444**  | .283  | .240    | .198   | -.079  | -.324   | -.303   |
| Luteimonas                | .468**  | .355*   | .275    | .336*   | -.203   | .068  | -.131   | .188   | .278   | .344    | .316    |
| Pseudoxanthomonas         | .631**  | .408*   | .526**  | .509**  | -.286   | -.026 | -.446** | .210   | -.089  | .622**  | .249    |
| Anaeromyxobacter          | -.287   | -.527** | -.495** | -.256   | .430**  | -.069 | .178    | -.139  | .086   | -.393*  | .016    |
| Clostridium_sensu_stricto | -.435** | -.590** | -.524** | -.365*  | .378*   | -.135 | .445**  | -.277  | .273   | -.591** | -.063   |
| Micromonospora            | .166    | .136    | .146    | .283    | -.429** | -.257 | -.306   | -.076  | -.350  | .132    | -.007   |

|                               |         |         |        |        |         |       |         |         |        |        |        |
|-------------------------------|---------|---------|--------|--------|---------|-------|---------|---------|--------|--------|--------|
| Virgisporangium               | .279    | .491**  | .276   | .039   | -.232   | -.148 | -.027   | .049    | -.079  | .389*  | .050   |
| Asanoa                        | .542**  | .352*   | .296   | .012   | -.049   | .102  | -.154   | .135    | .314   | .217   | .415*  |
| Caulobacter                   | -.030   | -.135   | -.143  | .177   | -.105   | -.294 | -.126   | -.523** | .218   | -.071  | .074   |
| Rhodopseudomonas              | .242    | .331*   | .462** | .245   | -.209   | .258  | -.001   | .331*   | .111   | .108   | .082   |
| Kribbella                     | .425**  | .577**  | .540** | .371*  | -.452** | .121  | -.291   | .288    | -.394* | .613** | -.006  |
| Chitinophaga                  | -.440** | -.303   | -.261  | -.175  | -.089   | .072  | .021    | -.239   | -.027  | -.438* | -.431* |
| Sphaerobacter                 | .425**  | .301    | .276   | .254   | -.262   | -.053 | -.144   | .063    | .110   | .398*  | .104   |
| Paenibacillus                 | .373*   | -.075   | .157   | .446** | -.214   | -.056 | -.440** | .133    | -.196  | .538** | .037   |
| Defluviicoccus                | -.150   | -.479** | -.232  | .081   | .342*   | -.016 | -.104   | -.306   | .028   | -.273  | .226   |
| Craurococcus                  | .424**  | .428**  | .461** | .318   | -.294   | .138  | -.169   | .148    | .172   | .098   | .347   |
| Lentzea                       | .264    | .258    | .515** | .315   | -.648** | .199  | -.444** | .333*   | -.286  | .195   | -.112  |
| Sphingorhabdus                | .570**  | .344*   | .390*  | .204   | -.177   | .196  | -.415** | .198    | .059   | .523** | .349   |
| Adhaeribacter                 | .208    | .614**  | .381*  | .041   | -.547** | .329* | -.324*  | .319    | .015   | .213   | .104   |
| Rhodomicrobium                | -.217   | -.538** | -.217  | -.033  | .426**  | .007  | .220    | .127    | 0      | 0      | 0      |
| Afipia                        | -.059   | .068    | .203   | .429** | -.261   | -.052 | .020    | -.015   | -.164  | -.011  | -.155  |
| Pelosinus                     | -.144   | -.494** | -.228  | -.055  | .381*   | -.046 | .035    | .034    | -.327  | .025   | -.025  |
| The number of genera (p<0.05) | 49      | 61      | 32     | 27     | 36      | 5     | 18      | 11      | 11     | 33     | 16     |
| The number of genera (p<0.01) | 34      | 35      | 14     | 8      | 20      | 0     | 5       | 2       | 2      | 17     | 3      |

a) Release of N<sub>2</sub>O, CO<sub>2</sub> and CH<sub>4</sub>, values of samples transplanted to 3600 m were not measured.

\*\* Correlation is significant at p<0.01 level (orange color), \* Significant at p<0.05 level (yellow color).

## Supplementary Figures

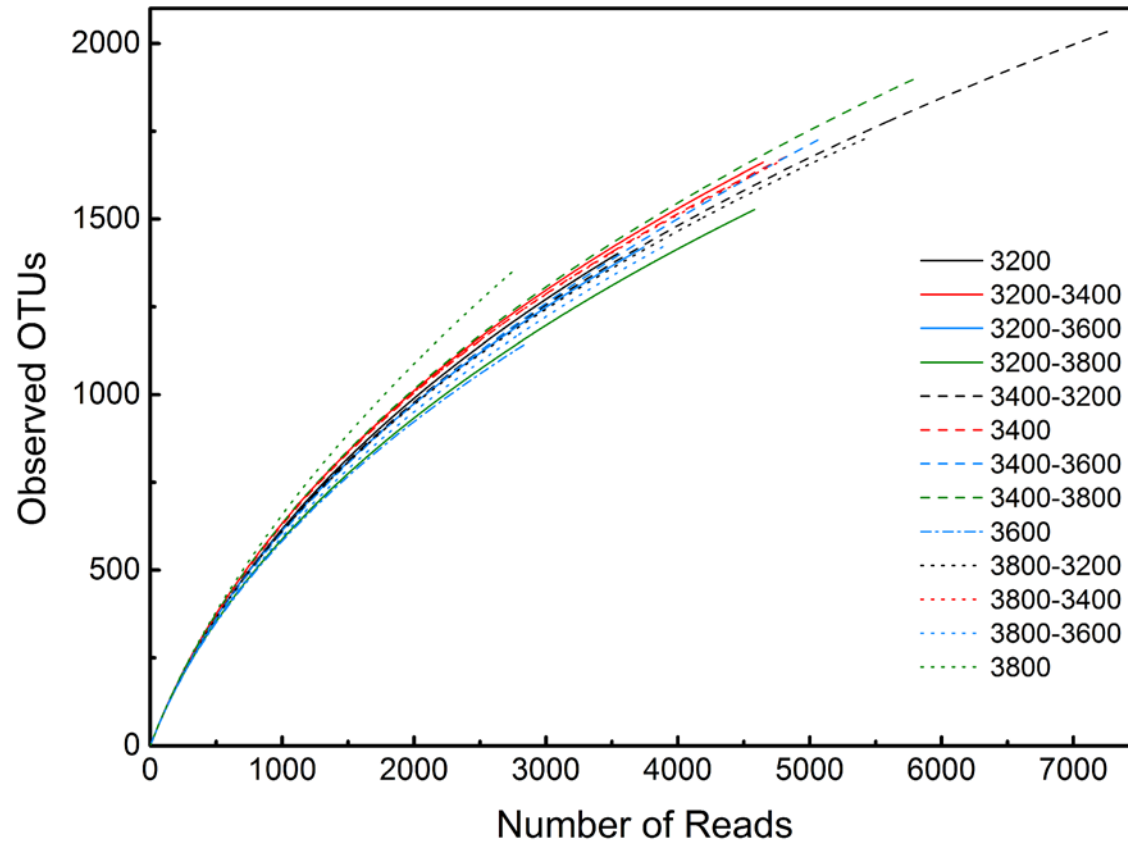

Fig. S1: Rarefaction curve of observed OTUs before re-sampling. Average value of triplicate or duplicate samples in each treatment was used.
